# Supplementary figures and images for: Enantioselective catalysts for the Henry reaction: fine-tuning the catalytic components
Source: Royal Society of Chemistry journal article supplement (doi:10.1039/b9nj00243j), 2009-01-01

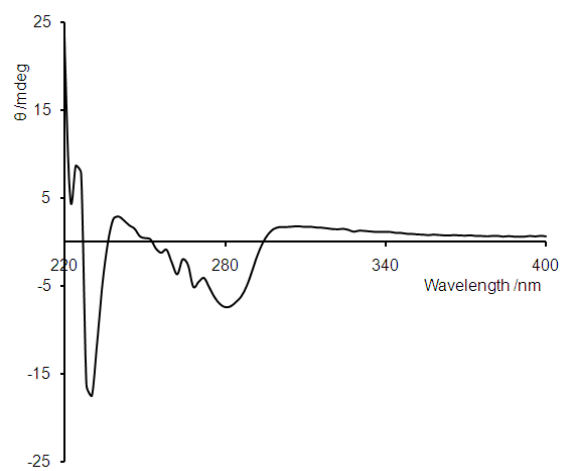

**Fig. S1** CD spectrum of H<sub>2</sub>2 in CH<sub>2</sub>Cl<sub>2</sub> ( $8.0 \times 10^{-5}$  mol dm<sup>-3</sup>).

Supplement: b9nj00243j.pdf [file b9nj00243j.pdf]
